# Supplementary material for: Mulberry Leaf Supplements Effecting Anti-Inflammatory Genes and Improving Obesity in Elderly Overweight Dogs
Source: MDPI journal article supplement (doi:10.3390/ijms232315215), 2022-12-02
Supplement: s1 [file s1]

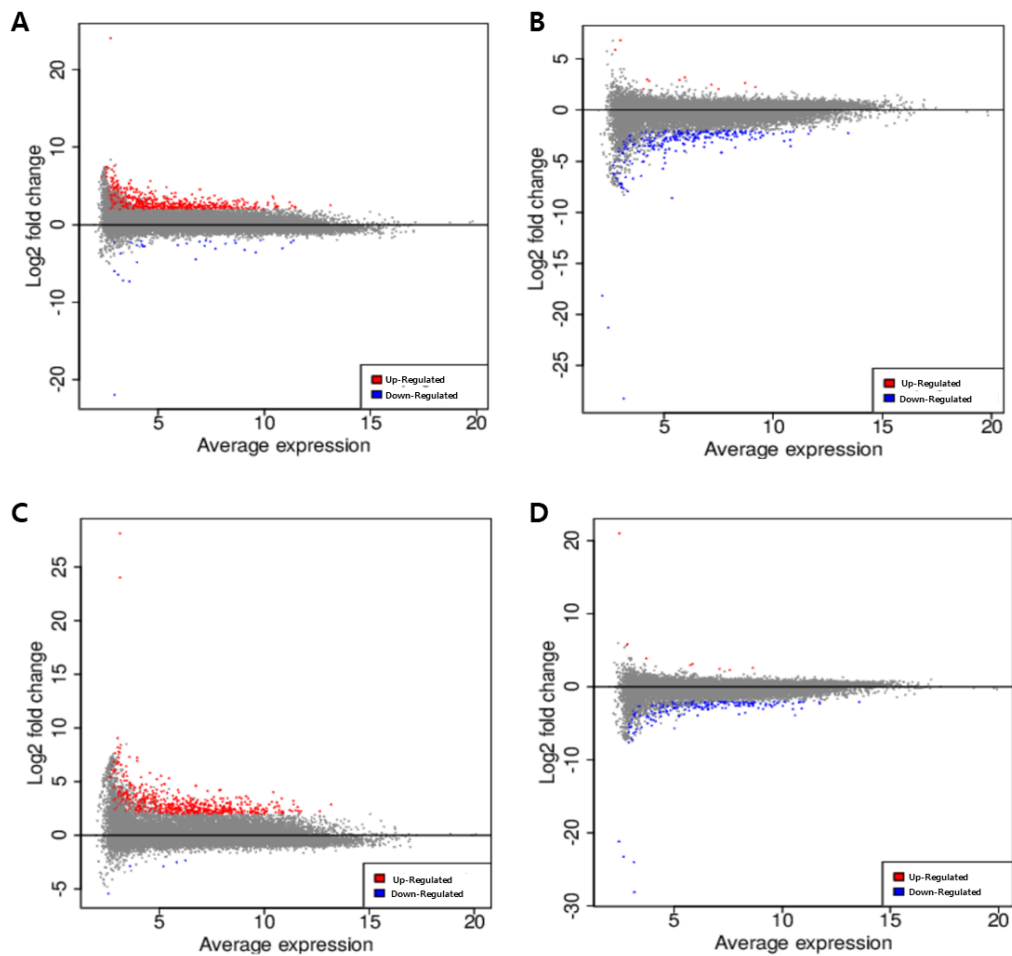

**Figure S1.** MA plots depicting fold change expression between the groups. (A) Comparison between After\_Mulberry\_100 Vs. Mulberry\_0 group. (B) Comparison between After\_Mulberry\_100 Vs. Before\_Mulberry\_40 group. (C) Comparison between Before\_Mulberry\_100 Vs. After\_Mulberry\_100 group. (D) Comparison between After\_Mulberry\_40 Vs. After\_Mulberry\_100 group. Mulberry\_0: normal diet group supplement with 40 mg/kg/day of maltodextrin; Mulberry\_40: normal diet group supplement with 40 mg/kg/day of mulberry leaf; Mulberry\_100: normal diet group supplement with 100 mg/kg/day of mulberry leaf.

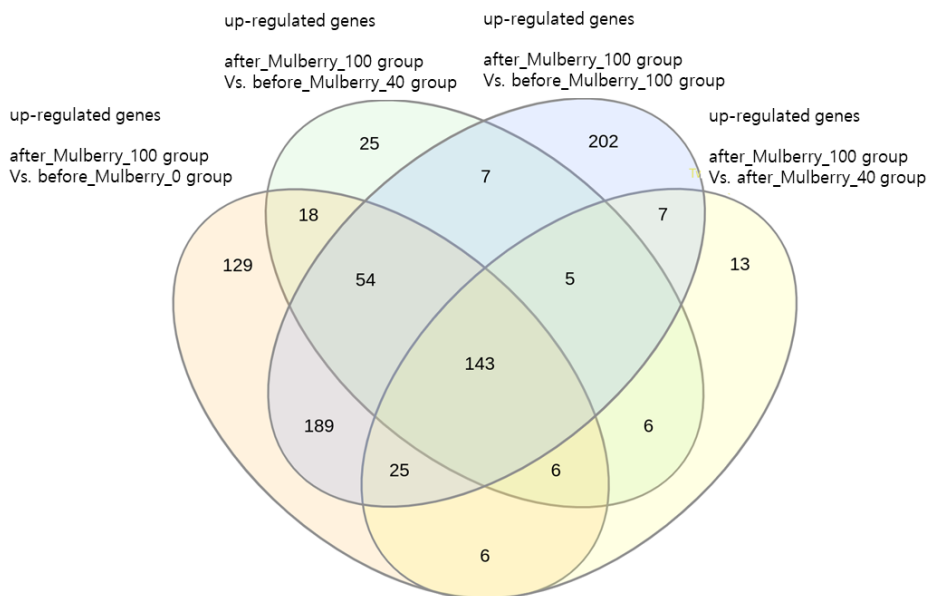

**Figure S2a.** Venn diagram depicting common up-regulated genes (URGTG) in the after\_Mulberry\_100 in comparison with before\_Mulberry\_0, 40, 100, and after\_Mulberry\_40 group.

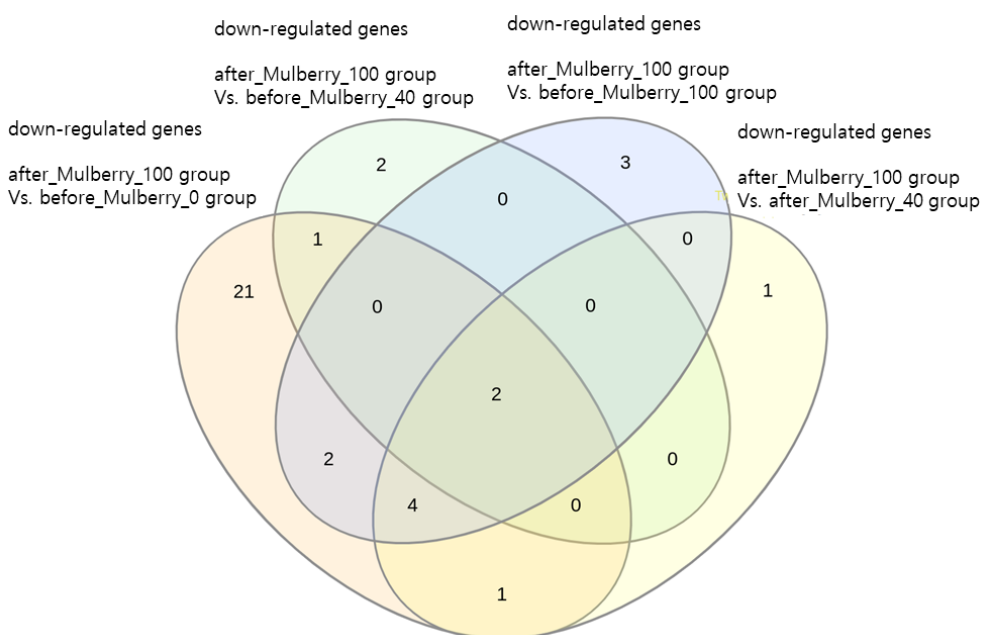

**Figure S2b.** Venn diagram depicting common down-regulated genes (URGTG) in the after\_Mulberry\_100 group in comparison with before\_Mulberry\_0, 40, 100, and after\_Mulberry\_40 group.

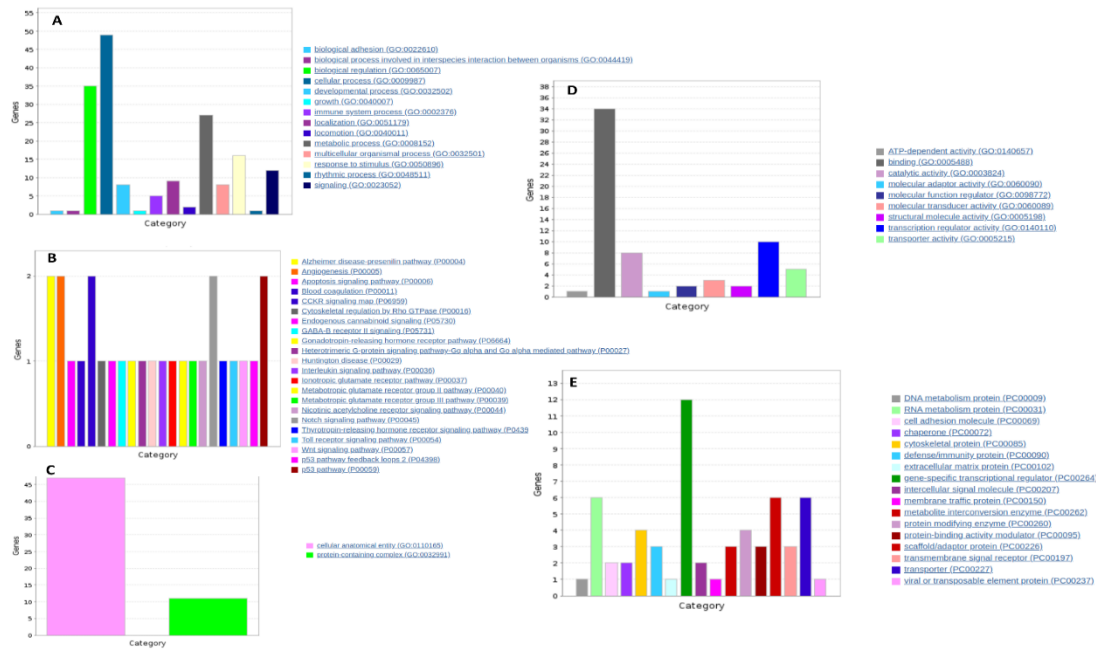

**Figure S3.** Functional enrichment analysis of 143 common up-regulated genes in af-ter\_Mulberry\_100 group (A) biological processes, (B) pathways, (C) cellular components, (D) molecular function, and (E) protein class

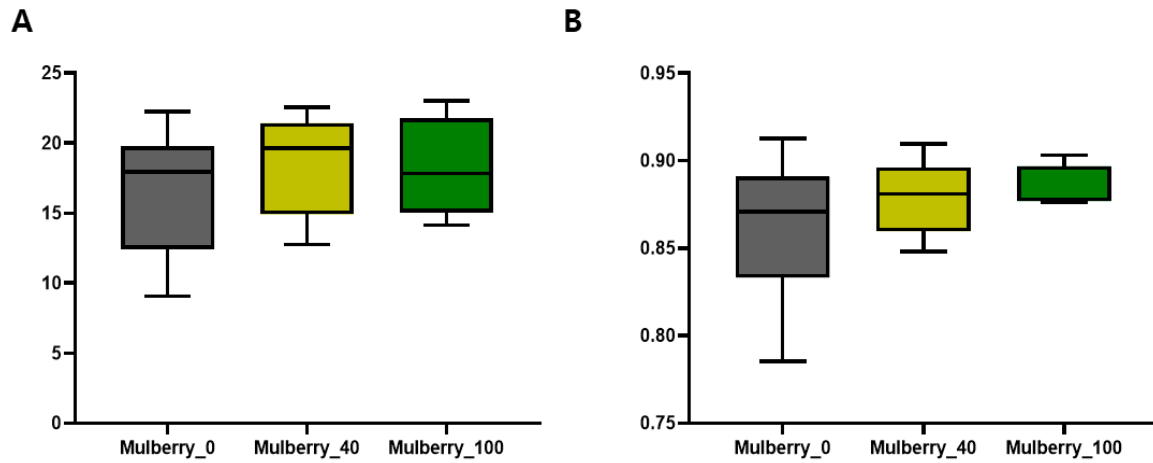

**Figure S4.** Alpha diversity plots of different studied groups. Faith's Phylogenetic Diversity (A) Faith's Phylogenetic Diversity. (B) Pielou's Evenness. Mulberry\_0: normal diet group supplement with 40 mg/kg/day of maltodextrin; Mulberry\_40: normal diet group supplement with 40 mg/kg/day of mulberry leaf; Mulberry\_100: normal diet group supplement with 100 mg/kg/day of mulberry leaf.

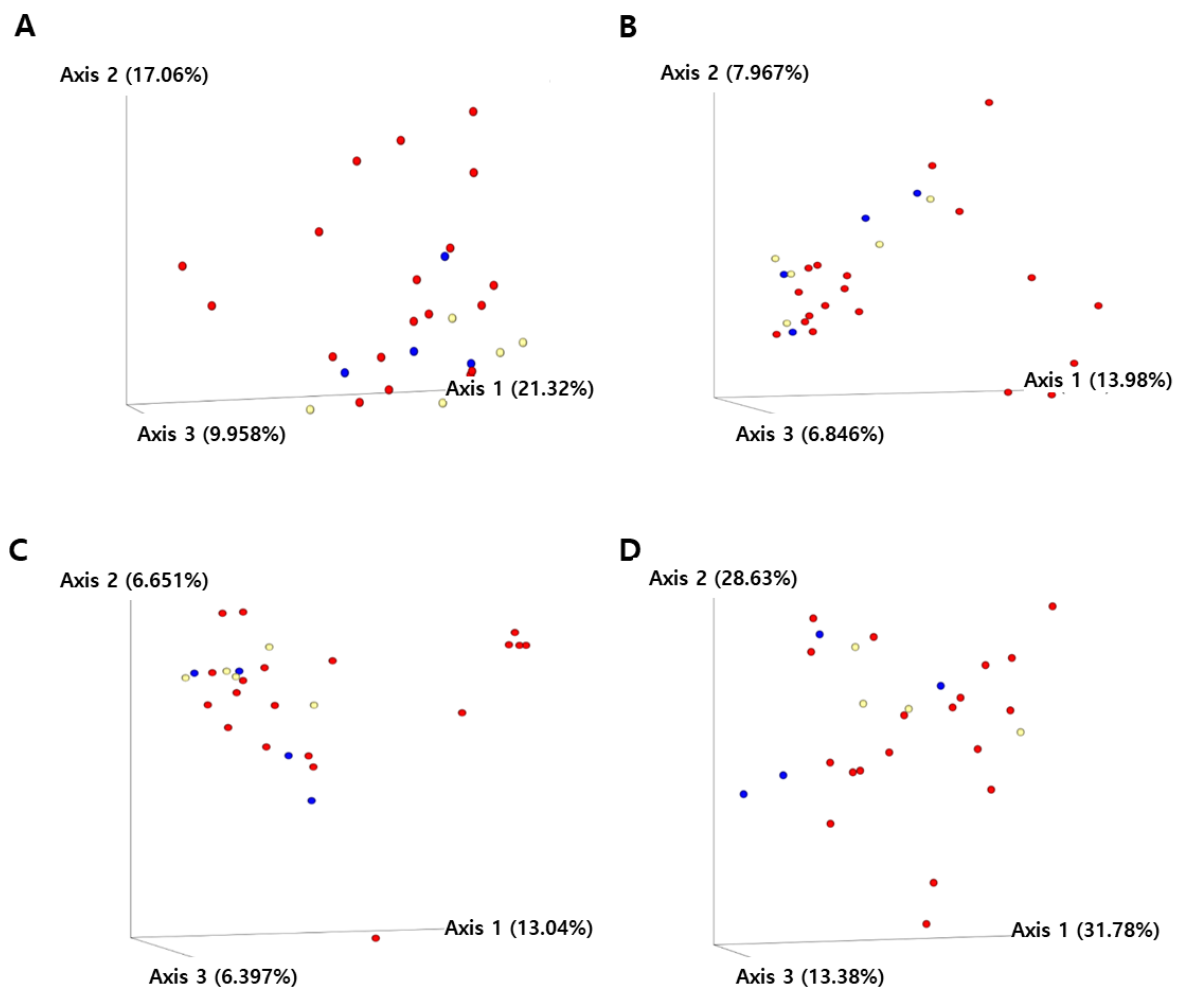

**Figure S5.** 3-D plots depicting Beta diversity in different groups (Red dot samples Mulberry\_0 group, green dot samples from Mulberry\_40 group and blue dot samples from the Mulberry\_100 group). (A) 3-D plot depicting beta diversity through Bray Curtis distance. (B) 3-D plot depicting beta diversity through unweighted UniFrac distance. (C) 3-D plot depicting beta diversity through Jaccard distance. (D) 3-D plot depicting beta diversity through weighted UniFrac distance. Mulberry\_0: normal diet group supplement with 40 mg/kg/day of maltodextrin; Mulberry\_40: normal diet group supplement with 40 mg/kg/day of mulberry leaf; Mulberry\_100: normal diet group supplement with 100 mg/kg/day of mulberry leaf.

Table S1. Details of the preprocessing and alignment results of reads from all samples.

| Sample ID  | # of read in million passed the filter | % reads passed the filter | Overall Alignment rate |
|------------|----------------------------------------|---------------------------|------------------------|
| AG1-2      | 81.31                                  | 99.08                     | 97.35                  |
| AG1-3      | 69.05                                  | 98.62                     | 96.59                  |
| AG1-10     | 73.85                                  | 98.46                     | 96.80                  |
| AG1-11     | 83.26                                  | 98.40                     | 96.76                  |
| AG1-12     | 65.78                                  | 98.47                     | 97.23                  |
| AG2-1      | 63.64                                  | 98.31                     | 96.96                  |
| AG2-4      | 76.38                                  | 98.11                     | 98.86                  |
| AG2-5      | 75.28                                  | 98.82                     | 97.15                  |
| AG2-7      | 77.14                                  | 98.76                     | 97.02                  |
| AG2-13     | 81.48                                  | 98.74                     | 96.61                  |
| AG3-9      | 73.18                                  | 98.79                     | 96.03                  |
| AG3-14     | 72.77                                  | 98.69                     | 96.60                  |
| AG3-15     | 61.32                                  | 97.04                     | 78.07                  |
| AG3-16     | 79.24                                  | 98.54                     | 96.54                  |
| AG3-17     | 86.70                                  | 98.63                     | 96.79                  |
| BG1-2      | 88.41                                  | 98.90                     | 97.18                  |
| BG1-3      | 75.41                                  | 99.09                     | 97.30                  |
| BG1-10     | 87.27                                  | 98.13                     | 96.78                  |
| BG1-11     | 87.35                                  | 98.33                     | 96.93                  |
| BG1-12     | 87.81                                  | 98.35                     | 96.88                  |
| BG2-1      | 79.82                                  | 98.38                     | 96.67                  |
| BG2-4      | 82.76                                  | 98.46                     | 96.94                  |
| BG2-5      | 84.98                                  | 98.47                     | 96.84                  |
| BG2-7      | 87.27                                  | 98.37                     | 96.32                  |
| BG2-13     | 58.65                                  | 98.47                     | 96.89                  |
| BG3-9      | 80.11                                  | 98.85                     | 97.12                  |
| BG3-14     | 72.29                                  | 98.88                     | 97.08                  |
| BG3-15     | 87.76                                  | 98.69                     | 91.55                  |
| BG3-16     | 80.27                                  | 98.71                     | 97.24                  |
| BG3-17     | 66.67                                  | 98.73                     | 96.94                  |
| Mean Value | 77.57367                               | 98.54233                  | 96.134                 |

Table S2. The primer sequences used for qPCR analysis.

| Gene     | Forward (5' - 3')    | Reverse (5' - 3')    | Size (bp) | Gene ID             |
|----------|----------------------|----------------------|-----------|---------------------|
| PTX3     | GTGGACCTGGACAACGAGAT | GGTGCCATAGGAGAACAGGA | 204       | ENSCAFG00000008902  |
| PDCD1    | CTACTGCTGCTGCTGACCTG | GATGGTGGCATACTCGGTCT | 216       | ENSCAFG000000013184 |
| TNFRSF1B | GGAGCCAGCAAAATGACCAA | AGGTAGGAGGAGGGAGACTG | 171       | ENSCAFG000000016422 |
| RUNX3    | GAACGGTGGTGACTGTGATG | TGAACACGGTGATGGTCAGT | 162       | ENSCAFG000000012903 |
| TICAM1   | ATGCTACCAAACAGCCCAGT | CAGAGGGCAAGGACAGAGAG | 163       | ENSCAFG000000018946 |
| CDKN1A   | TGGGAAGACTGGCGGTATAG | GCTTGACATGTTTCCCCACT | 151       | ENSCAFG000000029853 |

Table S3. Metadata\_ALDEx2.

| id               | Group-Dog   | Gtreatment  | Treatment   | Gender      | faith_pd    |
|------------------|-------------|-------------|-------------|-------------|-------------|
| #q2:types        | categorical | categorical | categorical | categorical | numeric     |
| After_Group1-10  | G1          | NO          | N           | F           | 19.58920146 |
| After_Group1-11  | G1          | NO          | N           | M           | 11.94270305 |
| After_Group1-12  | G1          | NO          | N           | F           | 20.11770272 |
| After_Group1-2   | G1          | NO          | N           | F           | 13.263933   |
| After_Group1-3   | G1          | NO          | N           | F           | 19.5508649  |
| After_Group2-1   | G2          | NO          | N           | M           | 20.18137904 |
| After_Group2-13  | G2          | NO          | N           | F           | 19.77849671 |
| After_Group2-4   | G2          | NO          | N           | M           | 12.41659131 |
| After_Group2-5   | G2          | NO          | N           | F           | 9.04674898  |
| After_Group2-7   | G2          | NO          | N           | M           | 18.81885452 |
| After_Group3-14  | G3          | NO          | N           | M           | 15.51909631 |
| After_Group3-16  | G3          | NO          | N           | F           | 11.75755856 |
| After_Group3-17  | G3          | NO          | N           | F           | 12.84889792 |
| After_Group3-9   | G3          | NO          | N           | F           | 22.25423952 |
| Before_Group1-10 | G1          | NO          | N           | F           | 17.96645501 |
| Before_Group1-11 | G1          | NO          | N           | M           | 11.45722651 |
| Before_Group1-12 | G1          | NO          | N           | F           | 20.43763757 |
| Before_Group1-2  | G1          | NO          | N           | F           | 18.85982563 |
| Before_Group1-3  | G1          | NO          | N           | F           | 14.5619868  |
| Before_Group2-1  | G2          | T           | Y           | M           | 20.25740496 |
| Before_Group2-13 | G2          | T           | Y           | F           | 19.63150074 |
| Before_Group2-4  | G2          | T           | Y           | M           | 17.08000515 |
| Before_Group2-5  | G2          | T           | Y           | F           | 12.75442908 |
| Before_Group2-7  | G2          | T           | Y           | M           | 22.57504644 |
| Before_Group3-14 | G3          | T2          | Y           | M           | 23.02983887 |
| Before_Group3-16 | G3          | T2          | Y           | F           | 14.1293932  |
| Before_Group3-17 | G3          | T2          | Y           | F           | 17.93999444 |
| BGBefore_Group   | G3          | T2          | Y           | F           | 17.70492416 |

Table S4. Metadata\_R platform.

| id              | Group-Dog   | Gtreatment  | Treatment   | Gender      | pielou_evenness |
|-----------------|-------------|-------------|-------------|-------------|-----------------|
| #q2:types       | categorical | categorical | categorical | categorical | numeric         |
| After_Group1-10 | G1          | NO          | N           | F           | 0.890862181     |
| After_Group1-11 | G1          | NO          | N           | M           | 0.8429761       |
| After_Group1-12 | G1          | NO          | N           | F           | 0.900644018     |
| After_Group1-2  | G1          | NO          | N           | F           | 0.879291184     |
| After_Group1-3  | G1          | NO          | N           | F           | 0.912375425     |
| After_Group2-1  | G2          | NO          | N           | M           | 0.909106859     |
| After_Group2-13 | G2          | NO          | N           | F           | 0.886906924     |
| After_Group2-4  | G2          | NO          | N           | M           | 0.788688076     |

|                  |    |    |   |   |             |
|------------------|----|----|---|---|-------------|
| After_Group2-5   | G2 | NO | N | F | 0.792869899 |
| After_Group2-7   | G2 | NO | N | M | 0.861915507 |
| After_Group3-14  | G3 | NO | N | M | 0.833232544 |
| After_Group3-16  | G3 | NO | N | F | 0.870695762 |
| After_Group3-17  | G3 | NO | N | F | 0.800700007 |
| After_Group3-9   | G3 | NO | N | F | 0.911900814 |
| Before_Group1-10 | G1 | NO | N | F | 0.876725099 |
| Before_Group1-11 | G1 | NO | N | M | 0.785194789 |
| Before_Group1-12 | G1 | NO | N | F | 0.860537158 |
| Before_Group1-2  | G1 | NO | N | F | 0.871227178 |
| Before_Group1-3  | G1 | NO | N | F | 0.839615753 |
| Before_Group2-1  | G2 | T  | Y | M | 0.871438254 |
| Before_Group2-13 | G2 | T  | Y | F | 0.880992654 |
| Before_Group2-4  | G2 | T  | Y | M | 0.847904359 |
| Before_Group2-5  | G2 | T  | Y | F | 0.909467798 |
| Before_Group2-7  | G2 | T  | Y | M | 0.882777727 |
| Before_Group3-14 | G3 | T2 | Y | M | 0.877979742 |
| Before_Group3-16 | G3 | T2 | Y | F | 0.878010709 |
| Before_Group3-17 | G3 | T2 | Y | F | 0.903036717 |
| Before_Group3-9  | G3 | T2 | Y | F | 0.876434816 |
